# Supplementary material for: Substituent Effects Impact Surface Charge and Aggregation of Thiophenol-Labeled Gold Nanoparticles for SERS Biosensors
Source: MDPI journal article supplement (doi:10.3390/bios12010025), 2022-01-05
Supplement: s1 [file s1]

Communication

# Substituent Effects Impact Surface Charge and Aggregation of Thiophenol-Labeled Gold Nanoparticles for SERS Biosensors

Nolan File <sup>1,2,†</sup>, Joseph Carmicheal <sup>3,†</sup>, Alexey V. Krasnoslobodtsev <sup>4</sup>, Nicole C. Japp <sup>1</sup>, Joshua J. Soucek <sup>1</sup>, Sudesna Chakravarty <sup>3</sup>, Michael A. Hollingsworth <sup>1,3,5,6,7</sup>, Aaron A. Sasson <sup>1,8</sup>, Gopalakrishnan Natarajan <sup>3</sup>, Prakash G. Kshirsagar <sup>3</sup>, Maneesh Jain <sup>3,6</sup>, Chihiro Hayashi <sup>3</sup>, Wade M. Junker <sup>1,3</sup>, Sukhwinder Kaur <sup>3,\*</sup> and Surinder K. Batra <sup>1,3,5,6,\*</sup>

<sup>1</sup> Sanguine Diagnostics and Therapeutics Inc., Omaha, NE 68106, USA;

nolanfile@gmail.com (N.F.); njapp@sdtne.com (N.C.J.); jsoucek@sdtne.com (J.J.S.);

mahollin@unmc.edu (M.A.H.); Aaron.Sasson@stonybrookmedicine.edu (A.A.S.);

wjunker@sdtne.com (W.M.J.)

<sup>2</sup> School of Chemistry, University of Edinburgh, Edinburgh EH8 9YL, UK

<sup>3</sup> Department of Biochemistry and Molecular Biology, University of Nebraska Medical Center, Omaha, NE 68198, USA; joseph.carmicheal@unmc.edu (J.C.); sudesna.chakravarty@unmc.edu (S.C.);

g.natarajan@unmc.edu (G.N.); prakash.kshirsagar@unmc.edu (P.G.K.); mjain@unmc.edu (M.J.);

chihiro.hayashi@unmc.edu (C.H.); wjunker@sdtne.com (W.M.J.)

<sup>4</sup> Department of Physics, University of Nebraska at Omaha, Omaha, NE 68182, USA; akrasnos@unomaha.edu

<sup>5</sup> Department of Pathology and Microbiology, University of Nebraska Medical Center, Omaha, NE 68198, USA

<sup>6</sup> Fred and Pamela Buffett Cancer Center, University of Nebraska Medical Center, Omaha, NE 68198, USA

<sup>7</sup> Eppley Institute for Research in Cancer and Allied Diseases, University of Nebraska Medical Center, Omaha, NE 68198, USA

<sup>8</sup> Department of Surgery, Renaissance School of Medicine, Stony Brook University, Stony Brook, NY 11794, USA

\* Correspondence: skaur@unmc.edu (S.K.); sbatra@unmc.edu (S.K.B.); Tel.: +1-402-559-3211. (S.K.); Tel.: +1-402-559-5455 (S.K.B.)

† These authors contributed equally to this work.

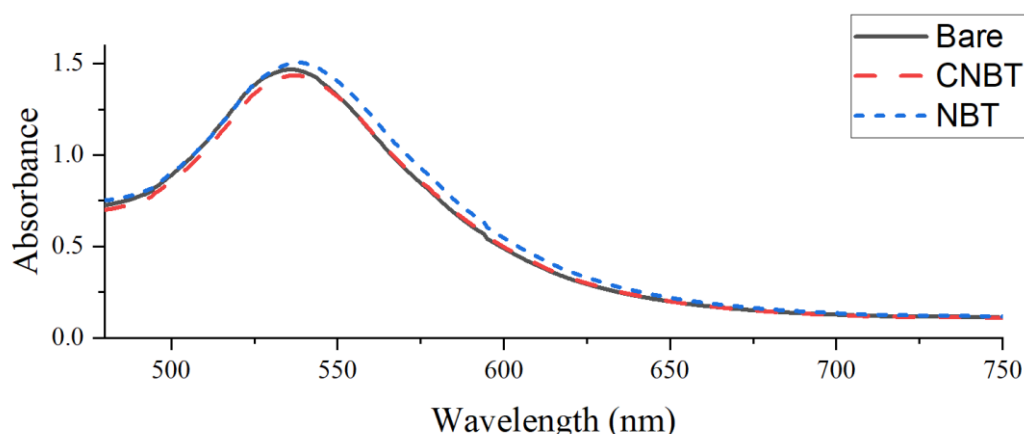

(a) UV-visible spectrum of unmodified (DSP linker only, black), DSP linker and CNBT (red) modified, and DSP linker and NBT (blue) modified showing the LSPR peak at 539 nm.

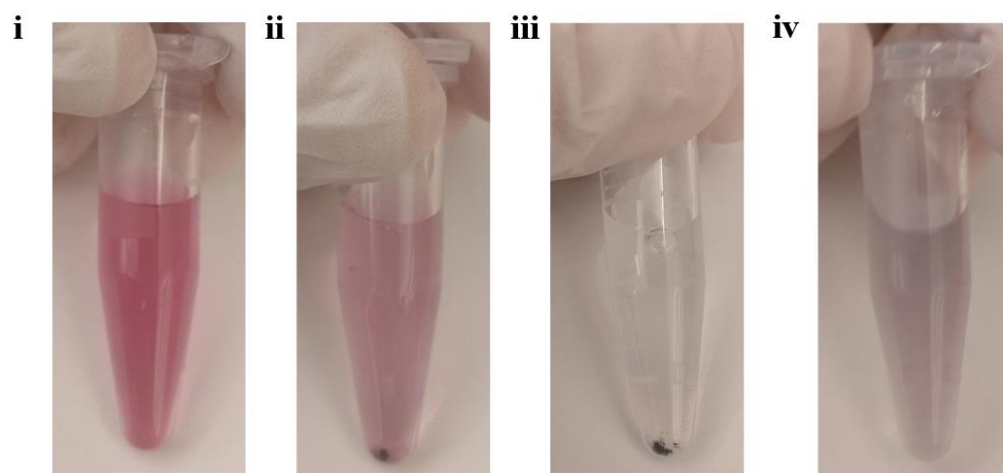

(b) Images of AuNPs treated with DSP linker and 4-nitrobenzenethiol (i), 4-methoxythiophenol (ii), and 4-aminothiophenol (iii) exhibiting no, partial, and total precipitation following centrifugation, respectively. AuNPs treated with 4-aminothiophenol prior to centrifugation (iv) exhibit rapid color change (spectral red-shift) associated with nanoparticle aggregation before precipitation occurs.

**Figure S1.** Surface Plasmon Resonance (LSPR) peak for unmodified and modified 60 nm gold nanoparticles (AuNPs).
